# Supplementary material for: Multi-element analysis of sunscreens using slurry sampling electrothermal vaporization inductively coupled plasma mass spectrometry
Source: Royal Society of Chemistry journal article supplement (doi:10.1039/c4ja00274a), 2014-08-29
Supplement: c4ja00274a1.pdf [file c4ja00274a1.pdf]

**Table S1** Effect of various modifiers on ion signals.<sup>a</sup> (n = 5)

|                        | Relative signal |            |             |            |            |           |            |
|------------------------|-----------------|------------|-------------|------------|------------|-----------|------------|
|                        | Cu              | As         | Cd          | Sb         | Hg         | Pb        | Bi         |
| No modifier            | 1.00            | 1.00       | 1.00        | 1.00       | 1.00       | 1.00      | 1.00       |
| 1.0% m/v EDTA          | 1.49± 0.11      | 0.94±0.04  | 1.05 ± 0.12 | 0.34± 0.02 | 0.94± 0.11 | 2.04±0.14 | 1.00± 0.09 |
| 1.0% m/v TAC           | 0.92± 0.06      | 0.98± 0.07 | 1.19± 0.08  | 1.19± 0.08 | 1.81± 0.16 | 1.14±0.09 | 1.19± 0.09 |
| 1.0% m/v Ascorbic acid | 0.77± 0.09      | 0.66±0.15  | 1.29±0.14   | 1.11±0.16  | 0.15±0.05  | 0.69±0.02 | 0.71± 0.08 |
| 1.0% m/v citric acid   | 0.86± 0.09      | 0.55± 0.11 | 0.99± 0.09  | 1.10 ±0.09 | 0.48±0.12  | 0.81±0.01 | 0.69± 0.07 |

<sup>a</sup> Values are means of five measurements ± standard deviation. All data were relative to no modifier. Slurry solution contained 1% m/v sunscreen, 1.0 µg L<sup>-1</sup> of Cu, As and Cd, 0.5 µg L<sup>-1</sup> of Hg and Bi, and spiked with various modifiers.

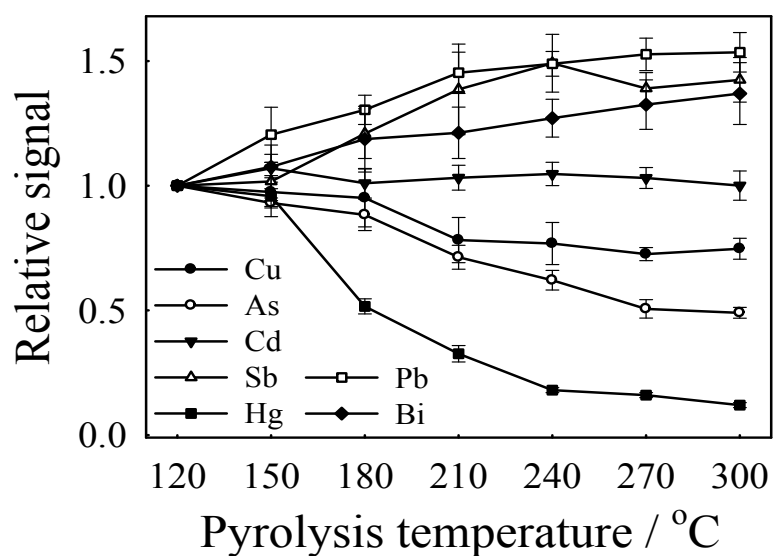

**Fig. S1** Effect of pyrolysis temperature on ion signals. Slurry solution contained 1% m/v sunscreen, 0.5% m/v TAC, 0.2% v/v HNO<sub>3</sub>, 0.1% m/v Triton X-100 and spiked with 1.0 µg L<sup>-1</sup> each of Cu, As, Cd and 0.5 µg L<sup>-1</sup> each of Hg and Bi. Vaporization temperature was set at 1500°C. Each data point represents the mean of five measurements. All data were relative to the first point.

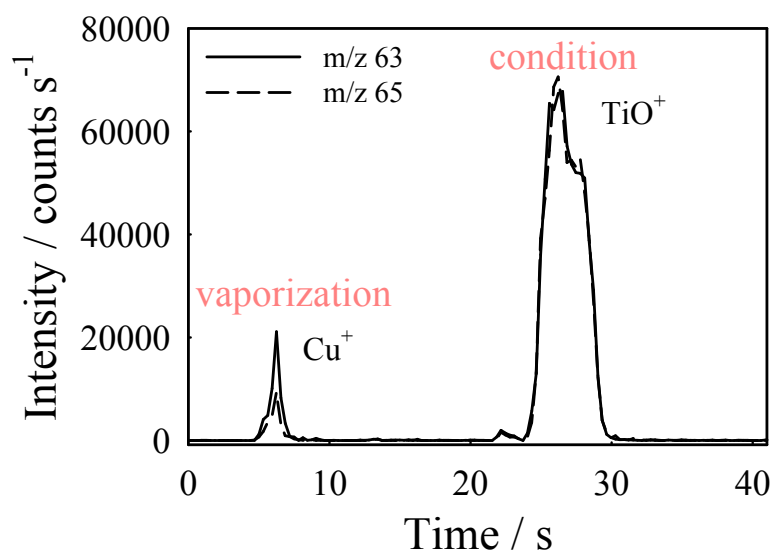

**Fig. S2** ETV-ICP-MS ion signals at m/z 63 and m/z 65. Slurry solution contained 1% m/v Sunscreen 3, 0.5% m/v TAC, 0.2% v/v HNO<sub>3</sub>, 0.1% m/v Triton X-100. Pyrolysis temperature was set at 150°C; Vaporization temperature and condition temperature was set at 1500°C and 2700°C, respectively. USS-ETV-ICP-MS operating conditions are listed in Tables 1 and 2.
